# Supplementary material
Source: PubMed Central journal article supplement (PMC4046795)
Supplement: nn406632u_si_001.pdf [file nn406632u_si_001.pdf]

## Supplementary Notes

### **Selective Uptake and Imaging of Aptamer- and Antibody-Conjugated Hollow Nanospheres Targeted to Epidermal Growth Factor Receptors Overexpressed in Head and Neck Cancer**

Marites Pasuelo Melancon<sup>1</sup>, Min Zhou<sup>2</sup>, Rui Zhang<sup>2</sup>, Chiyi Xiong<sup>2</sup>, Peter Allen<sup>3</sup>, Xiaoxia Wen<sup>2</sup>, Qian Huang<sup>2</sup>, Michael Wallace<sup>1</sup>, Jeffrey N. Myers<sup>4</sup>, R. Jason Stafford<sup>5</sup>, Dong Liang<sup>6</sup>, Andrew D. Ellington<sup>3</sup>, Chun Li<sup>2\*</sup>

Departments of <sup>1</sup>Interventional Radiology, <sup>2</sup>Cancer Systems Imaging, <sup>4</sup>Head and Neck Surgery, and <sup>5</sup>Imaging Physics, The University of Texas MD Anderson Cancer Center, 1515 Holcombe Boulevard, Houston, TX 77030

<sup>3</sup>Department of Chemistry and Biochemistry, The University of Texas at Austin, 1 University Station, Austin, TX 78712

<sup>6</sup>Department of Pharmaceutical Sciences, Texas Southern University, 3100 Cleburne Street, Houston, TX 77004

\*Address correspondence to: Chun Li, PhD, Department of Cancer Systems Imaging-Unit 59, The University of Texas MD Anderson Cancer Center, 1515 Holcombe Boulevard, Houston, TX 77030. Phone: 713-792-5182; Fax: 713-794-5456; E-mail: cli@mdanderson.org

### Stability of aptamer-HAuNS in mouse plasma

To measure the stability of aptamer on gold nanoparticles, apt-HAuNS (eqv. 0.4 mg Au) was suspended in 400  $\mu$ l Dulbecco's phosphate buffered saline containing 50% (v/v) mouse plasma (GeneTex, GTX73236, Irvine CA) and incubated at 37°C. Five minutes after mixing with plasma, or at 4 hrs and 24 hrs after incubation, 100  $\mu$ l aliquots of reaction mixture were withdrawn and centrifuged. Nanoparticle pellets were washed with Dulbecco's phosphate buffered saline four times and re-suspended in 100  $\mu$ l deionized water. Potassium cyanide (2  $\mu$ l, 1 M) was added 20  $\mu$ l of HAuNS to digest gold nanoparticles, the resulting clear solutions were mixed with TBE-urea sample buffer (Life Technologies, Grand Island, NY) and heated at 80°C for 5 min. Samples were analyzed by electrophoresis in a 15% denaturing polyacrylamide gel (TBE-urea gel, Life Technologies). RNAs were stained with SYBR gold stain (Invitrogen) and visualized with a blue laser light on FLA-5100 fluorescent imaging analyzer (Fuji Film Life Science, Stamford, CT). The image was processed using MultiGauge software (Fuji Film Life Science).

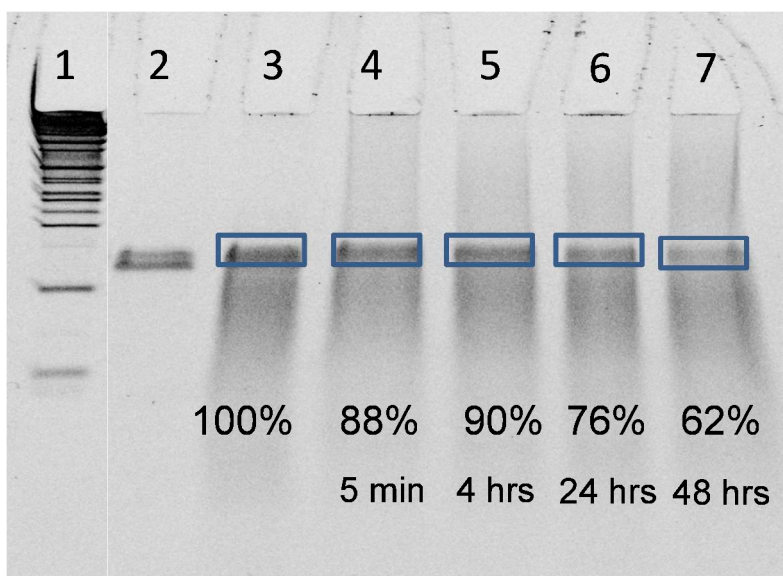

**Supplementary Figure S1. Stability of aptamer-HAuNS in mouse plasma.** Experimental details are described under “stability of aptamer-HAuNS in mouse plasma”. Aliquots were taken at the indicated time points. Percentages of aptamer attached to HAuNS are also indicated, taken amount of aptamer in aptamer-HAuNS without incubation with plasma as 100%. Lane 1: DNA ladder; Lane 2: aptamer E07 (0.4 pmole); Lane 3: apt-HAuNS (control); Lanes 4-6: apt-HAuNS incubated with 50% mouse plasma.
